# Supplementary material for: Recent Trends in Hospitalization for Acute Myocardial Infarction in Beijing: Increasing Overall Burden and a Transition From ST-Segment Elevation to Non-ST-Segment Elevation Myocardial Infarction in a Population-Based Study
Source: PubMed Central journal article supplement (PMC4748920; doi:10.1097/md.0000000000002677), 2016-02-08
Supplement: medi-95-e2677-s001.pdf [file medi-95-e2677-s001.pdf]

## **Supplementary material**

### **Validation procedures**

To validate the quality of the diagnostic information in the Beijing Hospital Discharge Information System (HDIS), 1069 patients with acute myocardial infarction (AMI) and 667 patients without AMI (unstable angina) admitted in 2012 were sampled using a stratified randomized sampling method according to the hospital level (secondary or tertiary) and the region in which the hospital was located (urban, suburban, or extra-urban). We over-sampled cases of AMI (4 times the estimated sample size) to increase the statistical power. Clinical information of each patient was extracted by chart review. First, we checked the concordance of ICD code-based diagnoses/procedures in the HDIS with the clinical diagnoses/procedures in the hospital charts (Table 1). Next, the ICD code-based AMI diagnosis in the HDIS was validated using the WHO-MONICA criteria (definite and possible AMI), the most widely used ‘gold standard’ for validation of AMI events,<sup>1,2</sup> based on information regarding symptoms, electrocardiogram, cardiac enzymes, and necropsy findings collected from the hospital records (Table 2). In this case, positive and negative predictive values were addressed instead of sensitivity and specificity because sensitivity and specificity were dependent on how many non-AMI cases were sampled for validation.<sup>3</sup> Similarly, we further validated the AMI coding in the HDIS using the contemporary Third Universal Definition of Myocardial Infarction<sup>4</sup> as the ‘gold standard’.

The concordance of ICD code-based diagnoses/procedures in the HDIS with the clinical diagnoses/procedures in the hospital charts was evaluated by the observed agreement rate (percentage of all cases for which the two diagnoses agreed) and Kappa statistic (0.81–0.99,

almost perfect agreement; 0.61–0.80, substantial agreement; 0.41-0.60, moderate agreement; 0.21-0.40, fair agreement; 0.01-0.20 slight agreement; <0 less than chance agreement)<sup>5</sup> The positive predictive value (PPV) of the ICD code-based AMI diagnosis in the HDIS was calculated as the proportion of patients that actually had AMI by the ‘gold standard’ (WHO-MONICA criteria or universal definition) with a coding of AMI in the HDIS, while the negative predictive value (NPV) was calculated as the proportion of true non-AMI diagnoses by the ‘gold standard’ with a coding of non-AMI in the HDIS.

As shown in *Table 1*, agreement on the ICD code-based diagnoses/procedures in the HDIS with the clinical diagnoses/procedures in the hospital charts was ‘almost perfect’ or ‘substantial’ with the Kappa statistic ranging from 0.725 to 0.918. The PPVs of AMI diagnosis in the HDIS compared with the WHO-MONICA criteria and the Third Universal Definition were 94.4% and 87.9%, respectively, with higher PPV values in tertiary than secondary hospitals. The corresponding NPVs were 96.1% and 97.0%, respectively, and were similar in secondary and tertiary hospitals (*Table 2*).

## References for supplementary material

1. Madsen M, Gudnason V, Pajak A, et al. Population-based register of acute myocardial infarction: manual of operations. *Eur J Cardiovasc Prev Rehabil.* 2007;14 Suppl 3:S3-22.
2. World Health Organization (WHO) 1999. MONICA Manual, Part IV: Event Registration. <http://www.thl.fi/publications/monica/manual/part4/iv-1.htm> (25 Feb 2015).
3. Mahonen M, Salomaa V, Torppa J, et al. The validity of the routine mortality statistics on coronary heart disease in Finland: comparison with the FINMONICA MI register data for the years 1983-1992. Finnish multinational MONItering of trends and determinants in CARDiovascular disease. *J Clin Epidemiol.* 1999;52(2):157-166.
4. Thygesen K, Alpert JS, Jaffe AS, et al. Third universal definition of myocardial infarction. *Eur Heart J.* 2012;33(20):2551-2567.
5. Viera AJ, Garrett JM. Understanding interobserver agreement: the kappa statistic. *Fam Med.* 2005;37(5):360-363.

Table 1. Concordance of ICD Code-based Diagnoses/Procedures in Hospital Discharge Information System with the Clinical Diagnoses/Procedures in Hospital Charts

| Clinical diagnosis/<br>procedure | ICD-10 codes                                       | Observed<br>agreement rate (%) | Kappa | <i>P</i> |
|----------------------------------|----------------------------------------------------|--------------------------------|-------|----------|
| AMI                              | I21-I22                                            | 92.2                           | 0.840 | <.001    |
| STEMI                            | I21.0, I21.1, I21.2, I21.3,<br>I22.0, I22.1, I22.8 | 91.0                           | 0.820 | <.001    |
| NSTEMI                           | I21.4                                              | 94.5                           | 0.880 | <.001    |
| Unspecified                      | I21.9, I22.9                                       | 97.5                           | 0.725 | <.001    |
| PCI                              | 00.66, 36.01, 36.02,<br>36.05, 36.06, 36.07        | 94.6                           | 0.888 | <.001    |
| CABG                             | 36.1                                               | 99.5                           | 0.918 | <.001    |

AMI=acute myocardial infarction, STEMI=ST-segment elevation myocardial infarction, NSTEMI=non-ST-segment elevation myocardial infarction, PCI=percutaneous coronary intervention, CABG=coronary artery bypass grafting, ICD=International Classification of Diseases.

Table 2. Predictive Value of ICD Codes for AMI in Hospital Discharge Information System for Clinical Diagnosis of AMI Defined by MONICA Criteria or Third Universal Definition of Myocardial Infarction

| Diagnosis                   | AMI diagnosis in HDIS=Yes |                        |     |        | AMI diagnosis in HDIS=No |                        |     |        |
|-----------------------------|---------------------------|------------------------|-----|--------|--------------------------|------------------------|-----|--------|
|                             | No. of patients           | Clinical AMI diagnosis |     | PPV(%) | No. of patients          | Clinical AMI diagnosis |     | NPV(%) |
|                             |                           | Yes                    | No  |        |                          | Yes                    | No  |        |
| <b>MONICA criteria</b>      |                           |                        |     |        |                          |                        |     |        |
| Secondary hospitals         | 349                       | 311                    | 38  | 89.1   | 267                      | 10                     | 257 | 96.3   |
| Tertiary hospitals          | 720                       | 698                    | 22  | 96.9   | 400                      | 16                     | 384 | 96.0   |
| Total                       | 1069                      | 1009                   | 60  | 94.4   | 667                      | 26                     | 641 | 96.1   |
| <b>Universal definition</b> |                           |                        |     |        |                          |                        |     |        |
| Secondary hospitals         | 349                       | 282                    | 67  | 80.8   | 267                      | 4                      | 263 | 98.5   |
| Tertiary hospitals          | 720                       | 658                    | 62  | 91.4   | 400                      | 16                     | 384 | 96.0   |
| Total                       | 1069                      | 940                    | 129 | 87.9   | 667                      | 20                     | 647 | 97.0   |

AMI=acute myocardial infarction, HDIS=Hospital Discharge Information System, PPV=positive predictive value, NPV=negative predictive value, MONICA=multinational MONItoring of trends and determinants in Cardiovascular disease.

Table 3. Geometric Means of Hospital Length of Stay (Days) for Patients with Acute Myocardial Infarction (AMI) in Beijing, by Sex, AMI Subtype, and Type of Intervention, 2007 to 2012

| Characteristic              | 2007 | 2008 | 2009 | 2010 | 2011 | 2012 | Relative change<br>2007-2012,% | P for trend |
|-----------------------------|------|------|------|------|------|------|--------------------------------|-------------|
| <b>Male</b>                 | 10.4 | 10.0 | 9.6  | 9.6  | 9.5  | 9.5  | -8.7                           | <.001       |
| STEMI                       | 10.3 | 9.7  | 9.2  | 9.2  | 9.3  | 9.4  | -8.7                           | <.001       |
| STEMI with PCI              | 10.6 | 9.6  | 9.4  | 9.2  | 9.4  | 9.6  | -9.4                           | <.001       |
| STEMI with CABG             | 25.9 | 27.7 | 28.5 | 27.4 | 27.8 | 23.9 | -7.7                           | .32         |
| STEMI without intervention  | 9.8  | 9.4  | 8.7  | 8.8  | 8.5  | 8.7  | -11.2                          | <.001       |
| NSTEMI                      | 11.2 | 10.8 | 10.4 | 10.2 | 10.1 | 9.5  | -15.2                          | <.001       |
| NSTEMI with PCI             | 10.4 | 9.6  | 9.5  | 9.0  | 9.3  | 8.7  | -16.3                          | <.001       |
| NSTEMI with CABG            | 24.8 | 27.1 | 26.0 | 26.0 | 25.7 | 21.7 | -12.5                          | .002        |
| NSTEMI without intervention | 11.1 | 10.8 | 10.4 | 10.4 | 10.1 | 9.6  | -13.5                          | <.001       |
| Unspecified                 | 9.4  | 10.1 | 9.9  | 10.0 | 9.6  | 9.4  | 0.0                            | .09         |
| <b>Female</b>               | 10.8 | 10.3 | 10.2 | 10.4 | 10.0 | 10.1 | -6.5                           | <.001       |
| STEMI                       | 10.6 | 10.0 | 9.7  | 9.8  | 9.4  | 9.7  | -8.5                           | <.001       |
| STEMI with PCI              | 11.9 | 10.8 | 10.1 | 10.1 | 10.1 | 10.5 | -11.8                          | <.001       |
| STEMI with CABG             | 30.4 | 28.8 | 31.1 | 31.0 | 28.4 | 24.3 | -20.1                          | .16         |
| STEMI without intervention  | 10.0 | 9.5  | 9.3  | 9.5  | 8.7  | 8.9  | -11.0                          | <.001       |
| NSTEMI                      | 12.7 | 11.3 | 11.4 | 11.6 | 10.9 | 10.7 | -15.7                          | <.001       |
| NSTEMI with PCI             | 13.5 | 11.0 | 10.5 | 10.5 | 10.3 | 9.7  | -28.1                          | <.001       |
| NSTEMI with CABG            | 32.8 | 29.0 | 31.6 | 24.8 | 31.0 | 24.2 | -26.2                          | .03         |
| NSTEMI without intervention | 12.0 | 11.0 | 11.3 | 11.6 | 10.8 | 10.7 | -10.8                          | .004        |

|              |      |      |     |     |     |     |      |       |
|--------------|------|------|-----|-----|-----|-----|------|-------|
| Unspecified  | 9.6  | 9.5  | 9.5 | 9.8 | 9.4 | 9.0 | -6.3 | .24   |
| <b>Total</b> | 10.6 | 10.1 | 9.8 | 9.8 | 9.7 | 9.7 | -8.5 | <.001 |

STEMI=ST-segment elevation myocardial infarction, NSTEMI= non-ST-segment elevation myocardial infarction,  
 PCI=percutaneous coronary intervention, CABG=coronary artery bypass grafting.

Table 4. Geometric Means of Hospital Costs Per Hospitalization (1000 RMB)\* for Patients with Acute Myocardial Infarction (AMI) in Beijing by Sex, AMI Subtype, and Type of Intervention, 2007 to 2012

| Characteristic              | 2007  | 2008  | 2009  | 2010  | 2011  | 2012  | Relative change | <i>P</i> for trend |
|-----------------------------|-------|-------|-------|-------|-------|-------|-----------------|--------------------|
|                             |       |       |       |       |       |       | 2007-2012,%     |                    |
| <b>Male</b>                 | 30.9  | 30.3  | 33.7  | 34.4  | 34.8  | 31.7  | 2.3             | <.001              |
| STEMI                       | 31.8  | 32.0  | 36.2  | 37.3  | 39.1  | 36.2  | 13.9            | <.001              |
| STEMI with PCI              | 67.4  | 63.7  | 63.0  | 61.8  | 61.0  | 55.1  | -18.1           | <.001              |
| STEMI with CABG             | 104.8 | 101.6 | 112.2 | 116.3 | 116.6 | 118.2 | 12.8            | <.001              |
| STEMI without intervention  | 20.8  | 16.7  | 16.4  | 16.2  | 17.5  | 17.3  | -16.8           | <.001              |
| NSTEMI                      | 27.8  | 26.4  | 29.1  | 30.1  | 29.2  | 26.5  | -4.6            | .32                |
| NSTEMI with PCI             | 73.7  | 66.3  | 65.7  | 64.5  | 64.2  | 51.6  | -30.0           | <.0001             |
| NSTEMI with CABG            | 96.8  | 105.9 | 109.6 | 108.1 | 112.5 | 99.8  | 3.1             | .79                |
| NSTEMI without intervention | 18.1  | 16.5  | 17.3  | 16.9  | 17.9  | 16.5  | -9.2            | .30                |
| Unspecified                 | 22.8  | 23.3  | 30.4  | 29.2  | 29.1  | 27.7  | 21.5            | .01                |
| <b>Female</b>               | 22.8  | 21.7  | 24.1  | 25.5  | 25.6  | 24.1  | 5.8             | <.001              |
| STEMI                       | 23.0  | 23.2  | 26.1  | 27.5  | 28.5  | 28.5  | 24.1            | <.001              |
| STEMI with PCI              | 66.4  | 64.2  | 62.7  | 61.8  | 59.2  | 57.1  | -14.0           | <.001              |
| STEMI with CABG             | 108.7 | 98.5  | 131.4 | 122.3 | 96.1  | 123.1 | 13.3            | .29                |
| STEMI without intervention  | 16.5  | 14.4  | 14.4  | 15.0  | 15.6  | 15.8  | -4.2            | .96                |
| NSTEMI                      | 23.7  | 19.8  | 22.2  | 24.0  | 23.8  | 21.9  | -7.3            | .12                |
| NSTEMI with PCI             | 77.2  | 68.2  | 65.3  | 66.6  | 63.0  | 55.4  | -28.2           | <.001              |
| NSTEMI with CABG            | 103.1 | 119.3 | 114.9 | 111.7 | 116.6 | 108.1 | 4.9             | .83                |
| NSTEMI without intervention | 17.2  | 14.3  | 16.2  | 16.8  | 17.2  | 16.2  | -5.6            | .06                |



|              |      |      |      |      |      |      |      |       |
|--------------|------|------|------|------|------|------|------|-------|
| Unspecified  | 15.2 | 16.6 | 21.4 | 21.9 | 21.0 | 18.7 | 23.2 | .22   |
| <b>Total</b> | 28.1 | 27.2 | 30.3 | 31.2 | 31.4 | 29.0 | 3.2  | <.001 |

---

STEMI=ST-segment elevation myocardial infarction, NSTEMI=non-ST-segment elevation myocardial infarction,

PCI=percutaneous coronary intervention, CABG=coronary artery bypass grafting.

\*After adjustment of inflation (1000 RMB=approximately 160 USD)
